# Supplementary material for: Synthetic-bioinformatic natural product-inspired peptides
Source: Royal Society of Chemistry journal article supplement (doi:10.1039/d4np00043a), 2024-10-31
Supplement: d4np00043a1.xlsx [file d4np00043a1.xlsx]

## Sheet: Sheet1
Name	Structure (Smiles)	Structure	Bioactivity	Potency	Reference # from main text
Humimycin A	OC1=CC=C(C=C1)C[C@@H](C(N[C@H](C(N[C@@H](C(N[C@@H](CC2=CC=CC=C2)C(N[C@@]([H])(C(N[C@H](C(N[C@H](C(O)=O)C(C)C)=O)C(C)C)=O)[C@@H](O)C)=O)=O)CC3=CC=C(C=C3)O)=O)CO)=O)NC(C[C@H](CCCCCCCCCCC)O)=O		Antibiotic (Gram-positive)	MIC: 4-32 mg/mL	29
Humimycin 17	O=C(N[C@@H](CO)C(N[C@@H](C(N[C@@H](CC1=CNC2=C1C=CC=C2)C(N[C@@H](C(N[C@@H](C(C)C)C(N[C@H](C(O)=O)C(C)C)=O)=O)[C@H](C)O)=O)=O)CC3=CC4=C(C=CC=C4)N3)=O)[C@@H](NC(C[C@@H](O)CCCCCCCCCCC)=O)CC5=CC6=C(C=CC=C6)N5		Antibiotic (Gram-positive)	MIC: 8 µg/mL	55
Syn-BNP 1 (1F)	O=C(N[C@@H](C(N[C@@]([H])(C(N[C@@H](C(N[C@H](CC1=CC=CC=C1)C(N[C@H](C(N[C@H](C(N[C@@H](C(N[C@@H](CC2=CC=CC=C2)C(N[C@H](C(N[C@H](C(N[C@@]([H])(C(N[C@H](C(O)=O)CCCN)=O)[C@H](C)CC)=O)C(C)C)=O)CO)=O)=O)CCCN)=O)CO)=O)CO)=O)=O)CO)=O)[C@H](C)CC)=O)CCCN)[C@@H](CC3=CC=CC=C3)NC(CCCCCCCCC)=O		Antibiotic (Gram-positive)	MIC: 2-32 mg/mL	53, 54
Syn-BNP 1 (1F)			Antibiotic (Gram-negative)	MIC: 16 to >64 mg/mL	53, 54
Syn-BNP 1 (1F)			Antifungal	128 µg/mL	53, 54
Syn-BNP 1 (1F)			Antiproliferative	IC50: 64 µg/mL	53, 54
1W	OC[C@@H](NC([C@](NC([C@@H](CCCN)NC([C@H](NC(CCCCCCCCC)=O)CC1=CC=CC=C1)=O)=O)([C@@H](CC)C)[H])=O)C(N[C@H](CC2=CNC3=C2C=CC=C3)C(N[C@@H](CO)C(N[C@@H](CO)C(N[C@H](CCCN)C(N[C@@H](CC4=CNC5=C4C=CC=C5)C(N[C@@H](CO)C(N[C@@H](C(C)C)C(N[C@@](C(N[C@@H](CCCN)C(O)=O)=O)([C@@H](CC)C)[H])=O)=O)=O)=O)=O)=O)=O)=O		Antibiotic (Gram-positive)	MIC: 1-128 mg/mL	54
1W			Antibiotic (Gram-negative)	MIC: 128 to > 128 mg/mL	54
3W	OC[C@H](C(N[C@@H](C(N[C@H](C(N[C@H](C(N[C@@H](C(N[C@H](C(N[C@H](C(N[C@H](C(N[C@@]([H])(C(N[C@H](C(O)=O)CCCN)=O)[C@H](C)CC)=O)C(C)C)=O)CO)=O)CC1=CNC2=C1C=CC=C2)=O)CCCN)=O)CO)=O)CO)=O)CC3=CNC4=C3C=CC=C4)=O)NC([C@]([H])(NC([C@H](NC([C@@H](CC5=CC=CC=C5)NC(CCCCC)=O)=O)CCCN)=O)[C@H](C)CC)=O		Antibiotic (Gram-positive)	MIC: 4-64 mg/mL	54
3W			Antibiotic (Gram-negative)	MIC: 8 to >128 mg/mL	54
4F	CC(N[C@@H](C(N[C@H](CCCN)C(N[C@@]([C@@H](CC)C)([H])C(N[C@H](CO)C(N[C@@H](C(N[C@@H](CO)C(N[C@@H](CO)C(N[C@H](CCCN)C(N[C@H](C(N[C@@H](CO)C(N[C@@H](C(C)C)C(N[C@@]([C@@H](CC)C)([H])C(N[C@@H](CCCN)C(O)=O)=O)=O)=O)=O)CC1=CC=CC=C1)=O)=O)=O)=O)CC2=CC=CC=C2)=O)=O)=O)=O)CC3=CC=CC=C3)=O		Antibiotic (Gram-positive)	MIC: 16-32 mg/mL	54
4F			Antibiotic (Gram-negative)	MIC: 8 - 128 mg/mL	54
4W	OC[C@@H](NC([C@](NC([C@@H](CCCN)NC([C@H](NC(C)=O)CC1=CC=CC=C1)=O)=O)([C@@H](CC)C)[H])=O)C(N[C@H](CC2=CNC3=C2C=CC=C3)C(N[C@@H](CO)C(N[C@@H](CO)C(N[C@H](CCCN)C(N[C@@H](CC4=CNC5=C4C=CC=C5)C(N[C@@H](CO)C(N[C@@H](C(C)C)C(N[C@@](C(N[C@@H](CCCN)C(O)=O)=O)([C@@H](CC)C)[H])=O)=O)=O)=O)=O)=O)=O)=O		Antibiotic (Gram-positive)	MIC: 1-32 mg/mL	54
4W			Antibiotic (Gram-negative)	MIC: 2 - 16 mg/mL	54
5F	N[C@H](CC1=CC=CC=C1)C(N[C@@H](C(N[C@@]([H])(C(N[C@@H](C(N[C@H](CC2=CC=CC=C2)C(N[C@H](C(N[C@H](C(N[C@@H](C(N[C@@H](CC3=CC=CC=C3)C(N[C@H](C(N[C@H](C(N[C@@]([H])(C(N[C@H](C(O)=O)CCCN)=O)[C@H](C)CC)=O)C(C)C)=O)CO)=O)=O)CCCN)=O)CO)=O)CO)=O)=O)CO)=O)[C@H](C)CC)=O)CCCN)=O		Antibiotic (Gram-positive)	MIC: 16-128 mg/mL	54
5F			Antibiotic (Gram-negative)	MIC: 4-64 mg/mL	54
5W	OC[C@H](C(N[C@@H](C(N[C@H](C(N[C@H](C(N[C@@H](C(N[C@H](C(N[C@H](C(N[C@H](C(N[C@@]([H])(C(N[C@H](C(O)=O)CCCN)=O)[C@H](C)CC)=O)C(C)C)=O)CO)=O)CC1=CNC2=C1C=CC=C2)=O)CCCN)=O)CO)=O)CO)=O)CC3=CNC4=C3C=CC=C4)=O)NC([C@]([H])(NC([C@H](NC([C@@H](CC5=CC=CC=C5)N)=O)CCCN)=O)[C@H](C)CC)=O		Antibiotic (Gram-positive)	MIC: 2-8 mg/mL	54
5W			Antibiotic (Gram-negative)	MIC: 2-16 mg/mL	54
6F	NCCC[C@H](C(N[C@@]([H])(C(N[C@@H](C(N[C@H](CC1=CC=CC=C1)C(N[C@H](C(N[C@H](C(N[C@@H](C(N[C@@H](CC2=CC=CC=C2)C(N[C@H](C(N[C@H](C(N[C@@]([H])(C(N[C@H](C(O)=O)CCCN)=O)[C@H](C)CC)=O)C(C)C)=O)CO)=O)=O)CCCN)=O)CO)=O)CO)=O)=O)CO)=O)[C@H](C)CC)=O)NC([C@@H](CC3=CC=CC=C3)NC(CCCCCC4=CC=CC=C4)=O)=O		Antibiotic (Gram-positive)	MIC: 4 to >128 mg/mL	54
6F			Antibiotic (Gram-negative)	MIC: 4 to >128 mg/mL	54
7F	O=C(C1=CC=CC=C1)N[C@@H](C(N[C@H](CCCN)C(N[C@@]([C@@H](CC)C)([H])C(N[C@H](CO)C(N[C@@H](C(N[C@@H](CO)C(N[C@@H](CO)C(N[C@H](CCCN)C(N[C@H](C(N[C@@H](CO)C(N[C@@H](C(C)C)C(N[C@@]([C@@H](CC)C)([H])C(N[C@@H](CCCN)C(O)=O)=O)=O)=O)=O)CC2=CC=CC=C2)=O)=O)=O)=O)CC3=CC=CC=C3)=O)=O)=O)=O)CC4=CC=CC=C4		Antibiotic (Gram-positive)	MIC: 16-128 mg/mL	54
7F			Antibiotic (Gram-negative)	MIC: 8 to >128 mg/mL	54
7W	OC[C@H](C(N[C@@H](C(N[C@H](C(N[C@H](C(N[C@@H](C(N[C@H](C(N[C@H](C(N[C@H](C(N[C@@]([H])(C(N[C@H](C(O)=O)CCCN)=O)[C@H](C)CC)=O)C(C)C)=O)CO)=O)CC1=CNC2=C1C=CC=C2)=O)CCCN)=O)CO)=O)CO)=O)CC3=CNC4=C3C=CC=C4)=O)NC([C@]([H])(NC([C@H](NC([C@@H](CC5=CC=CC=C5)NC(C6=CC=CC=C6)=O)=O)CCCN)=O)[C@H](C)CC)=O		Antibiotic (Gram-positive)	MIC: 16-128 mg/mL	54
7W			Antibiotic (Gram-negative)	MIC: 32 to >128 mg/mL	54
SyCPA 2	NC(CC[C@H](C(N[C@@H](C)C(N[C@@H](C(N[C@@H](CC1=CC=CC=C1)C(N2CCC[C@H]23)=O)=O)C(C)C)=O)=O)NC([C@H]4CCCN4C([C@@H](CNC3=O)NC(CCCCCCCCCCCCC)=O)=O)=O)=O		Antibiotic (Gram-positive)	MIC: 8 mg/mL	51
SyCPA 2			Antibiotic (Gram-negative)	MIC: >64 mg/mL	51
SyCPA 2			Antiproliferative	IC50: > 64 mg/mL	51
SyCPA 4	OC[C@@H](NC([C@@H](NC([C@@H](NC(CCCCCCCCCCCC)=O)C)=O)CNC([C@@H](C(C)C)N1)=O)=O)C(N[C@@H](CCCCN)C(N[C@H](CCCNC(N)=N)C(N[C@@H](CCCCN)C(NCC1=O)=O)=O)=O)=O		Antibiotic (Gram-positive)	MIC: 8-64 mg/mL	51
SyCPA 4			Antibiotic (Gram-negative)	MIC: >64 mg/mL	51
SyCPA 4			Antiproliferative	IC50: >64 mg/mL	51
SyCPA 116	CC(C)C[C@H](C(N[C@@](C(N[C@@H](C(C)C)C(N[C@@H](CO)C(N[C@]([C@@H](C)CC)([H])C1=O)=O)=O)=O)([C@H](C)O)[H])=O)NC(CC(N1)CCCCCCCCCCC)=O		Antibiotic (Gram-positive)	MIC: 4-8 mg/mL	51
SyCPA 116			Antibiotic (Gram-negative)	MIC: >64 mg/mL	51
SyCPA 116			Antiproliferative	IC50: >64 mg/mL	51
SyCPA 153	O=C(N[C@H](CC(C)C)C1=O)[C@@H](CCCNC(N)=N)NC([C@@H](NC([C@H](NC([C@@H](NC([C@H](NC([C@H](NC([C@@H](NC([C@@H](NC([C@H](NC([C@H](NC([C@@H](NC([C@H](N1)C(C)C)=O)C(C)C)=O)CC(C)C)=O)C)=O)C(C)C)=O)C)=O)C(C)C)=O)C(C)C)=O)C(C)C)=O)CC2=CNC3=C2C=CC=C3)=O)CC(C)C)=O		Antibiotic (Gram-positive)	MIC: 8-32 mg/mL	51
SyCPA 153			Antibiotic (Gram-negative)	MIC: >64 mg/mL	51
SyCPA 153			Antiproliferative	IC50 > 64	51
SyCPA 12	CCCCCCCCCCCCCC(N[C@@H](C(N[C@@H](C(N[C@H](CC(C)C)C(N[C@H](C(N[C@@H](C(N1CCC[C@H]1C(N[C@H](C(N[C@H](CC2=CC=CC=C2)C(N[C@@H]3[C@H](C)O)=O)=O)CCCN)=O)=O)CO)=O)CCCN)=O)=O)CC(N)=O)=O)CNC3=O)=O		Antibiotic (Gram-positive)	MIC: 4-16 mg/mL	51
SyCPA 12			Antibiotic (Gram-negative)	MIC: 8 to >32 mg/mL	51
SyCPA 12			Antiproliferative	IC50: >64 mg/mL	51
SyCPA 63	O=C(CCCCCCCCCCCC)N[C@@H](CCCN1)C(N[C@H](CCCNC(N)=N)C(N[C@@]([C@@H](C)CC)(C(N[C@@H](CCCNC(N)=N)C(N[C@H](CC(C)C)C1=O)=O)=O)[H])=O)=O		Antibiotic (Gram-positive)	MIC: 4-8 mg/mL	51
SyCPA 63			Antibiotic (Gram-negative)	MIC: 8-32 mg/mL	51
SyCPA 63			Anti-tuberculosis	MIC: 6 mg/mL	51
SyCPA 63			Antiproliferative	IC50: 64 µg/mL	51
SyCPA 102	NC(NCCC[C@@H](NC1=O)C(NC(CC(N[C@@H](C(N[C@]([C@@H](C)O)([H])C(NCC(N[C@H]1CC2=CC=C(C=C2)O)=O)=O)=O)CC3=CNC4=C3C=CC=C4)=O)CCCCCCCCCCC)=O)=N		Antibiotic (Gram-positive)	MIC: 2-8 mg/mL	51
SyCPA 102			Antibiotic (Gram-negative)	MIC: 16 to >64 mg/mL	51
SyCPA 102			Antiproliferative	IC50: >64 mg/mL	51
SyCPA 123	O=C(NC(CCCCCCCCCCC)CC(N[C@H](C(N[C@@H](CO)C(N[C@@](C(N[C@@H](CCCNC(N)=N)C(N1)=O)=O)([C@H](C)O)[H])=O)=O)CC2=CC=CC=C2)=O)[C@H]1CC3=CC=CC=C3		Antibiotic (Gram-positive)	MIC: 4-8 mg/mL	51
SyCPA 123			Antibiotic (Gram-negative)	MIC: 8 to >64 mg/mL	51
SyCPA 123			Antiproliferative	IC50: >64 mg/mL	51
SyCPA 144	CCCCCCCCCCCC(NC([C@@H]1CC2=CC=CC=C2)=O)CC(N[C@@H](C(N[C@H](CCCN)C(N[C@@H](C(C)C)C(N[C@@](C(N[C@H](C(N[C@H](C(N1)=O)C)=O)CC3=CC=CC=C3)=O)([H])[C@@H](C)CC)=O)=O)=O)CC4=CC=CC=C4)=O		Antibiotic (Gram-positive)	MIC: 4-8 mg/mL	51
SyCPA 144			Antibiotic (Gram-negative)	MIC: 8 to >64 mg/mL	51
SyCPA 144			Antiproliferative	IC50: >64 mg/mL	51
Syn-BNP 2	NCCCC[C@H](NC([C@@H](NC([C@@H]1CCCN1C([C@@H](C(C)C)NC(CNC([C@@H](NC([C@@H](CCCCN)NC(CC(CCCCCCCCCCC)O)=O)=O)CC(C)C)=O)=O)=O)=O)CC(C)C)=O)C(N[C@@H](CCCNC(N)=N)C(N[C@@H](CCCCN)C(O)=O)=O)=O		Antifungal	MIC: 2-32 mg/mL	53
Syn-BNP 2			Antiproliferative	IC50: >128 mg/mL	53
Syn-rhodomin (8)	O=C([C@@H](NC1=O)CC2=CC=CC=C2)N[C@H](C(N[C@]([C@H](O)C)([H])C(N[C@H](C(N[C@@H](CC(C=C3)=CC=C3O)C(N[C@H]1CC(C=C4)=CC=C4O)=O)=O)CC5=CC=CC=C5)=O)=O)CC(C)C		Antibiotic (Gram-positive)	MIC: >10 mg/mL	52
Syn-rhodomin (8)			Antibiotic (Gram-negative)	MIC: >10 mg/mL	52
Syn-rhodomin (8)			Antifungal	MIC: >10 mg/mL	52
Syn-rhodomin (8)			Antiproliferative	IC50: 27 mM	52
Syn-hoagimin B (34)	CCCCCCCC(NC([C@H](CC1=CC=CC=C1)NC([C@@H](NC([C@]([H])(NC([C@@H](NC([C@H](NC([C@]([H])(NC([C@@H](NC2)C)=O)[C@H](O)C)=O)C)=O)CC(C)C)=O)[C@H](C)O)=O)CC(C)C)=O)=O)CC2=O		Antibiotic (Gram-positive)	MIC: >10 mg/mL	52
Syn-hoagimin B (34)			Antibiotic (Gram-negative)	MIC: >10 mg/mL	52
Syn-hoagimin B (34)			Antifungal	MIC: >10 mg/mL	52
Syn-hoagimin B (34)			Antiproliferative	IC50: 1.7 mM	52
Syn-parascrofin (40)	CCCCCCCC(NC([C@@H]1CC2=CC=CC=C2)=O)CC(N[C@H](C(N[C@H](C(N[C@@H](C(N[C@H](C(N[C@@H](C(N1)=O)C)=O)C)=O)C)=O)CC3=CC=CC=C3)=O)C)=O		Antibiotic (Gram-positive)	MIC: >10 mg/mL	52
Syn-parascrofin (40)			Antibiotic (Gram-negative)	MIC: >10 mg/mL	52
Syn-parascrofin (40)			Antifungal	MIC: >10 mg/mL	52
Syn-parascrofin (40)			Antiproliferative	IC50: 0.13 mM	52
Syn-kroppenstin (71)	CCCCCCCCCC(N[C@@H](CCC(N)=O)C(N[C@H](C(N[C@H](C(N[C@H](C(N1)=O)CC(C)C)=O)C)=O)CNC([C@@H]1CC(C)C)=O)=O)=O		Antibiotic (Gram-positive)	MIC: >10 mg/mL	52
Syn-kroppenstin (71)			Antibiotic (Gram-negative)	MIC: >10 mg/mL	52
Syn-kroppenstin (71)			Antifungal	MIC: >10 mg/mL	52
Syn-kroppenstin (71)			Antiproliferative	IC50: 0.30 mM	52
Cilagicin	OC(C[C@H](NC([C@H](NC([C@@]([C@H](OC([C@@H]1CC2=CC=CC=C2)=O)C)([H])NC([C@H](NC(CCCCCCCCCCCCC)=O)CO)=O)=O)CCN)=O)C(NCC(N[C@H](CC(N)=O)C(N[C@H](CC(O)=O)C(NCC(N[C@@H](CC(C=C3)=CC=C3O)C(N[C@@H](C(C)C)C(N[C@H](C(N1)=O)CCN)=O)=O)=O)=O)=O)=O)=O)=O		Antibiotic (Gram-positive)	MIC: 0.125-4 mg/mL	42, 57
Cilagicin			Antibiotic (Gram-negative)	MIC:4 to >64 mg/mL	42, 57
Cilagicin			Antiproliferative	IC50: >64 mg/mL	42, 57
Paenilagicin	OC(C[C@H](NC([C@@H](CCO)NC([C@@]([C@H](OC1=O)C)([H])NC(CCCCCCCCCCCCC)=O)=O)=O)C(NCC(N[C@H](CC(N)=O)C(NCC(NCC(N[C@@H](CC(C=C2)=CC=C2O)C(N[C@@](C(N[C@@H](CCCN)C(N[C@H]1CC(C=C3)=CC=C3O)=O)=O)([H])[C@@H](C)CC)=O)=O)=O)=O)=O)=O)=O		Antibiotic (Gram-positive)	MIC: 2 mg/mL	57
Paenilagicin			Antibiotic (Gram-negative)	MIC: 8 mg/mL for Acinetobacter baumannii	57
Bacilagicin	N=C(N)NCCC[C@H](C(N[C@H](C(NCC(N[C@@H](C(N[C@@H](C(NCC(N[C@H](C(N[C@H](C(N[C@H](C(N[C@H]1CC2=CC=C(O)C=C2)=O)CO)=O)C(C)C)=O)CC3=CC=C(O)C=C3)=O)=O)CC(O)=O)=O)CC(N)=O)=O)=O)CC(O)=O)=O)NC([C@@]([H])(NC([C@@H](NC(CCCCCCCCCCCCC)=O)CO[H])=O)[C@@H](C)OC1=O)=O		Antibiotic (Gram-positive)	MIC: 2-4 mg/mL	57
Bacilagicin			Antibiotic (Gram-negative)	MIC> 64 mg/mL	57
Virgilagicin	OC(C[C@H](NC([C@@H](CCCNC(N)=N)NC([C@@]([C@H](OC([C@H](C(C)C)N1)=O)C)([H])NC(CCCCCCCCCCCCC)=O)=O)=O)C(NCC(N[C@H](CC(N)=O)C(N[C@H](CC(O)=O)C(NCC(N[C@@H](CC(C=C2)=CC=C2O)C(N[C@@H](C(C)C)C(N[C@@H](CCCNC(N)=N)C1=O)=O)=O)=O)=O)=O)=O)=O)=O		Antibiotic (Gram-positive)	MIC: 2-8 mg/mL	57
Virgilagicin			Antibiotic (Gram-negative)	MIC> 64 mg/mL	57
Cinnamosyn	O=C(N[C@@H](CC1=CC=CC=C1)C(N[C@H](CC(C)C)C(N[C@H](C(N[C@@H](C)C(N[C@@H](C(NCC(N2CCC[C@H]2C(N[C@H](C(N3)=O)CCCN)=O)=O)=O)CCCN)=O)=O)C(C)C)=O)=O)[C@H]([C@@H](OC([C@@H]3CC(C)C)=O)C)NC(/C=C/C4=C(C=CC=C4)C)=O		Antibiotic (Gram-positive)	MIC: 8 to > 50 mg/mL	56
Cinnamosyn			Antibiotic (Gram-negative)	MIC: 8 to > 50 mg/mL	56
Cinnamosyn			Antifungal	MIC: > 64 mg/mL	56
Cinnamosyn			Antiproliferative	IC50: 4 - 21 µM	56
Laterocidine	O=C(N[C@@H](C(N[C@@H](C(N[C@@H](C(N[C@H](C(NCC(N[C@@H](C(N[C@H](C(N[C@]([H])(C(N[C@@]([H])([C@H](CC)C)C(N[C@H](C(NC1)=O)CC(N)=O)=O)=O)[C@@H](C)OC(CNC1=O)=O)=O)CC2=CNC3=C2C=CC=C3)=O)CCCN)=O)=O)CCCN)=O)CCCN)=O)CC4=CNC5=C4C=CC=C5)=O)CC6=CC=C(O)C=C6)[C@H](NC(CCCCCC(C)C)=O)CO		Antibiotic (Gram-postive)	MIC: >128 mg/mL	41
Laterocidine			Antibiotic (Gram-neg)	MIC: 0.5-2 mg/mL	41
syn-CNRLP1	O=C([C@H](NC([C@@H](CC(N)=O)NC(CCCCCC(C)C)=O)=O)CC1=CC=C(C=C1)O)N[C@H](CC2=CNC3=C2C=CC=C3)C(N[C@H](CCCN)C(N[C@@H](CCCN)C(NCC(N[C@H](CCCN)C(N[C@@H](CC4=CNC5=C4C=CC=C5)C(N[C@](C(N[C@@]([C@@H](C)CC)(C(N[C@@H](CC(N)=O)C(NCC6=O)=O)=O)[H])=O)([C@H](OC(CN6)=O)C)[H])=O)=O)=O)=O)=O)=O		Antibiotic (Gram-postive)	MIC: >128 mg/mL	41
syn-CNRLP1			Antibiotic (Gram-negative)	MIC: 0.25-4 mg/mL	41
syn-CNRLP2	O=C(N[C@@H](C(N[C@@H](C(N[C@@H](C(N[C@@H](C(N[C@H](C(NCC(N[C@@H](C(N[C@H](C(N[C@]([H])(C(N[C@@]([H])([C@H](CC)C)C(NCC(N[C@H]1CO)=O)=O)=O)[C@@H](C)OC(CNC1=O)=O)=O)CC2=CNC3=C2C=CC=C3)=O)CCCN)=O)=O)CCCN)=O)CCCN)=O)CC4=CNC5=C4C=CC=C5)=O)CC6=CC=C(C=C6)O)=O)CO[H])CCCCCC(C)C		Antibiotic (Gram-positive)	MIC: 64-128 mg/mL	41
syn-CNRLP2			Antibiotic (Gram-negative)	MIC: 1-4 mg/mL	41
syn-CNRLP3	[H]NC(C[C@@H]1NC([C@]([H])([C@H](CC)C)NC([C@@]([H])(NC([C@@H](NC([C@H](NC(CNC([C@@H](NC([C@H](NC([C@H](NC([C@H](NC([C@H](NC(CCCCCC(C)C)=O)CO)=O)CC2=CC=C(C=C2)O)=O)CC3=CNC4=C3C=CC=C4)=O)CCCN)=O)CCCN)=O)=O)CCCN)=O)CC5=CNC6=C5C=CC=C6)=O)[C@@H](C)OC(CNC([C@@H](NC1=O)CCCN)=O)=O)=O)=O)=O		Antibiotic (Gram-positive)	MIC: >128 mg/mL	41
syn-CNRLP3			Antibiotic (Gram-negative)	MIC: 1-4 mg/mL	41
Tridecaptin A	OC(CC[C@@H](C(N[C@H](C(N[C@@H](C(N[C@H](C)C(O)=O)=O)[C@@H](CC)C)=O)C(C)C)=O)NC([C@H](CC1=CC=CC=C1)NC([C@@H](CCN)NC([C@H](CCN)NC([C@@H](NC([C@H](NC([C@H](NC(CNC([C@@H](CCN)NC([C@H](NC(C[C@@H](CC[C@H](CC)C)O)=O)C(C)C)=O)=O)=O)CO)=O)CC2=CNC3=C2C=CC=C3)=O)CO)=O)=O)=O)=O)=O		Antibiotic (Gram-positive)	MIC: 64-128 mg/mL	41
Tridecaptin A			Antibiotic (Gram-negative)	MIC: 1-64 mg/mL	41
syn-CNRLP4	OC(CC[C@@H](C(N[C@H](C(N[C@@H](C(N[C@@H](C(O)=O)CO)=O)[C@@H](CC)C)=O)C(C)C)=O)NC([C@H](CC1=CC=CC=C1)NC([C@@H](CCN)NC([C@@H](NC(CNC([C@H](NC([C@H](NC([C@@H](C)NC([C@@H](CCN)NC([C@H](NC(C[C@@H](CC[C@H](CC)C)O)=O)C(C)C)=O)=O)=O)CO)=O)CC2=CNC3=C2C=CC=C3)=O)=O)CO)=O)=O)=O)=O		Antibiotic (Gram-positive)	MIC: >128 mg/mL	41
syn-CNRLP4			Antibiotic (Gram-negative)	MIC: 1 to >128 mg/mL	41
syn-CNRLP5	OC(CC[C@@H](C(N[C@H](C(N[C@@H](C(N[C@@H](C(O)=O)CCCN)=O)[C@@H](CC)C)=O)C(C)C)=O)NC([C@H](CC1=CC=CC=C1)NC([C@@H](CCN)NC([C@@H](NC([C@@H](NC([C@H](NC([C@H](NC([C@H](NC([C@@H](CCN)NC([C@H](NC(C[C@@H](CC[C@H](CC)C)O)=O)C(C)C)=O)=O)C(C)C)=O)CO)=O)CC2=CNC3=C2C=CC=C3)=O)CO)=O)CCC(N)=O)=O)=O)=O)=O		Antibiotic (Gram-positive)	MIC: 2-8 mg/mL	41
syn-CNRLP5			Antibiotic (Gram-negative)	MIC: 1 to >128 mg/mL	41
syn-CNRLP6	OC(CC[C@@H](C(N[C@@]([H])([C@H](CC)C)C(N[C@@H](C(N[C@H](C)C(O)=O)=O)[C@@H](CC)C)=O)=O)NC([C@H](CC1=CC=CC=C1)NC([C@@H](CCN)NC([C@H](CCN)NC([C@@H](NC([C@H](NC([C@H](NC(CNC([C@@H](CCN)NC([C@H](NC(C[C@@H](CC[C@H](CC)C)O)=O)C(C)C)=O)=O)=O)CO)=O)CC2=CNC3=C2C=CC=C3)=O)CO)=O)=O)=O)=O)=O		Antibiotic (Gram-positive)	MIC: >128 mg/mL	41
syn-CNRLP6			Antibiotic (Gram-negative)	MIC: 1 to >128 mg/mL	41
Paenibacterin	OC[C@@H](NC1=O)C(N[C@@H]([C@H](CC)C)C(N2[C@@H](CCC2)C(N[C@@H](C(N[C@H](C(N[C@H](C(O[C@@H]([C@@H](C(N[C@@H](C(N[C@H](C(N[C@@H](C(C)C)C(N[C@@H]1CCCCN)=O)=O)CO)=O)CCCN)=O)NC([C@@H](NC([C@@H](CCCN)NC(CCCCCCCCCCCCC)=O)=O)C(C)C)=O)C)=O)[C@H](CC)C)=O)CCCCN)=O)C(C)C)=O)=O)=O		Antibiotic (Gram-positive)	MIC: 8-16 mg/mL	41
Paenibacterin			Antibiotic (Gram-negative)	MIC: 4-8 mg/mL	41
syn-CNRLP7	OC[C@H](C(N[C@H](C(N1[C@H](C(N[C@@]([C@@H](C)CC)([H])C(N2[C@@H](CCC2)C(N[C@@H]([C@@H](C)CC)C(O[C@H](C)[C@H](NC([C@H](C(C)C)NC([C@H](NC(CCCCCCCCCCCCC)=O)CCCN)=O)=O)C(N[C@H](CCCN)C(N[C@@H](CO)C(N[C@H](C(N[C@@H]3CCCCN)=O)CC4=CC=CC=C4)=O)=O)=O)=O)=O)=O)=O)CCC1)=O)[C@@H](C)CC)=O)NC3=O		Antibiotic (Gram-positive)	MIC: 2-8 mg/mL	41
syn-CNRLP7			Antibiotic (Gram-negative)	MIC: 8-64 mg/mL	41
Macolacin	CC[C@H](C)CCCCC(N[C@H](C(N[C@]([C@H](O)C)([H])C(N[C@H](CO)C(N[C@H](C(N[C@H](C(N[C@@H](C(N[C@@](C(N[C@H](C(N[C@H](C(N1)=O)CCN)=O)CCN[H])=O)([H])[C@@H](C)CC)=O)CC(C)C)=O)CCN)=O)CCNC([C@@H]1CC(C)C)=O)=O)=O)=O)CCN)=O		Antibiotic (Gram-negative)	MIC: 1-8 mg/mL	44
pNP-23	O=C(N[C@H](CC1=CC=CC=C1)C(N[C@H](CC(C)C)C(N[C@]([H])2[C@@H](C)O)=O)=O)[C@H](CC3=CC=CC=C3)NC(CNC2=O)=O		Antibiotic (Gram-positive)	MIC: > 32 mg/mL	48
pNP-23			Antibiotic (Gram-negative)	MIC: 16 to > 32 mg/mL	48
pNP-23			Antiproliferative	IC50: >16 mg/mL	48
pNP-80	OC[C@@H](C(N[C@@H](C(N[C@H](C(N[C@@H](C(N[C@H](C(N[C@@H](C(N1)=O)CC2=CNC3=C2C=CC=C3)=O)CO)=O)CCCN)=O)CCCN)=O)CCCN)=O)NC([C@H](NC([C@@H]1CC4=CC=CC=C4)=O)CC5=CNC6=C5C=CC=C6)=O		Antibiotic (Gram-positive)	MIC: 8-16 mg/mL	48
pNP-80			Antibiotic (Gram-negative)	MIC: 16 to >32 mg/mL	48
pNP-80			Antiproliferative	IC50: >16 mg/mL	48
pNP-51	NCCC[C@@H](NC([C@@H](NC([C@H](N1)CCCN)=O)CCCN)=O)C(N[C@@H](CC2=CC=CC=C2)C(N[C@H](CC3=CC=CC=C3)C(N[C@@H](CC4=CC=CC=C4)C1=O)=O)=O)=O		Antibiotic (Gram-positive)	MIC: >32 mg/mL	48
pNP-51			Antibiotic (Gram-negative)	MIC: 16 to >32 mg/mL	48
pNP-51			Antiproliferative	IC50: >16 mg/mL	48
pNP-111	NCCC[C@@H](NC([C@@]([H])(NC([C@H](N1)C(C)C)=O)[C@@H](C)O)=O)C(N[C@H](C(N[C@@H](C(N[C@H](C(N[C@H](C)C(N[C@@H](C(N[C@@H](C(N[C@@H](CC2=CC=CC=C2)C1=O)=O)C(C)C)=O)C(C)C)=O)=O)CC3=CNC4=C3C=CC=C4)=O)CCCN)=O)CCCN)=O		Antibiotic (Gram-positive)	MIC: >32 mg/mL	48
pNP-111			Antibiotic (Gram-negative)	MIC: 32 to > 32 mg/mL	48
pNP-111			Antiproliferative	IC50: >16 mg/mL	48
pNP-81	O=C(N[C@@H](C(N[C@H](C(N[C@@H](C(N[C@H](C(N[C@@H](C(N[C@H](C(N[C@@H]1Cc2ccccc2)=O)CO)=O)CCCN)=O)CCCN)=O)CCCN)=O)CO)=O)CC3=CNC4=C3C=CC=C4)[C@H](CC5=CNC6=C5C=CC=C6)NC1=O		Antibiotic (Gram-positive)	MIC: 8-32 mg/mL	48
pNP-94a	NCCC[C@H](NC([C@@H](NC([C@@H](C(C)C)NC1=O)=O)C2=CC=CC=C2)=O)C(N[C@H]([C@](C)([H])O)C(N[C@@H](CCCCN)C(N[C@@H](C(N[C@@H](C(C)C)C(N[C@@H]1C(C)C)=O)=O)CC3=CC=CC=C3)=O)=O)=O		Antibiotic (Gram-positive)	MIC: 16-32 mg/mL	48
pNP-66	NCCCC[C@H](C(N[C@H](C(N[C@@H](C(N[C@@H](CC1=CC=CC=C1)C(N2)=O)=O)CCCN)=O)CCCN)=O)NC([C@H](CC3=CC=CC=C3)NC([C@@H](NC([C@H]2CC4=CC=CC=C4)=O)CC5=CNC6=C5C=CC=C6)=O)=O		Antibiotic (Gram-positive)	MIC: 8-16 mg/mL	48
pNP-130	NCCC[C@@H](NC([C@@]([H])(NC([C@H](N1)CCCN)=O)[C@@H](C)O)=O)C(N[C@H](C(N[C@@H](C(N[C@]([H])(C(N[C@H](C)C(N[C@@H](C(N[C@@H](C(N[C@@H](CC2=CC=CC=C2)C1=O)=O)C(C)C)=O)C(C)C)=O)=O)[C@@H](C)O)=O)CC3=CNC4=C3C=CC=C4)=O)C5=CC=CC=C5)=O		Antibiotic (Gram-positive)	MIC: 16 mg/mL	48
pNP-40	N=C(NCCC[C@H](NC([C@H](N1)CC2=CC=CC=C2)=O)C(N[C@@H](C(N[C@](C(N[C@@H](C(N[C@@H](CC3=CC=CC=C3)C1=O)=O)CC(C)C)=O)([C@H](O)C)[H])=O)C)=O)N		Antibiotic (Gram-positive)	MIC: 4 mg/mL	48
pNP-33	NC(C[C@@H](NC([C@@H](NC([C@@H](C(C)C)N1)=O)CC(C)C)=O)C(N[C@@H](CO)C(N[C@H](CCCNC(N)=N)C(N[C@@H](CC2=CC=CC=C2)C1=O)=O)=O)=O)=O		Antibiotic (Gram-positive)	MIC: 32 mg/mL	48
pNP-30	N=C(N)NCCC[C@@H](NC([C@H](C(C)C)N1)=O)C(N[C@](C(N[C@@](C(N[C@H](C(N[C@H](CC2=CC=CC=C2)C1=O)=O)CC3=CC=CC=C3)=O)([C@@H](C)O)[H])=O)([C@H](O)C)[H])=O		Antibiotic (Gram-positive)	MIC: 4-8 mg/mL	48
pNP-19	NC(NCCC[C@H]1NC([C@@H](NC([C@@H](CC2=CC=CC=C2)NC([C@@H](NC([C@]([H])(NC1=O)[C@@H](C)O)=O)CC3=CC=CC=C3)=O)=O)C(C)C)=O)=N		Antibiotic (Gram-positive)	MIC: 8-16 mg/mL	48
pNP-124	O=C(N[C@H](CCCCN)C(N[C@@H]([C@@H](C)O)C(N[C@H](CCCCN)C(N[C@@H](C(C)C)C(N[C@@H](C(N[C@H](C(N[C@@H](C(N[C@H](C(C)C)C(N1)=O)=O)C)=O)CC2=CNC3=C2C=CC=C3)=O)CC4=CNC5=C4C=CC=C5)=O)=O)=O)=O)[C@@H](NC([C@H]1C)=O)CC6=CNC7=C6C=CC=C7		Antibiotic (Gram-positive)	MIC: 16-32mg/mL	48
pNP-43	NCCC[C@H](C(N[C@](C(N[C@H](CCCNC(N)=N)C(N[C@@H](C(C)C)C(N[C@@H]1CC2=CC=CC=C2)=O)=O)=O)([C@H](O)C)[H])=O)NC([C@@H](NC1=O)CC3=CC=CC=C3)=O		Antibiotic (Gram-neg)	MIC: 16-32 mg/mL	48
pNP-43			Amoebicidal	IC50: 4.6 mM	47
pNP-40/CyPPS1	NC(NCCC[C@H](NC([C@H](NC([C@@H](NC([C@H](NC([C@@](N1)([C@H](O)C)[H])=O)CC(C)C)=O)CC2=CC=CC=C2)=O)CC3=CC=CC=C3)=O)C(N[C@H](C)C1=O)=O)=N		Proteasome Stimulation	EC50: 6.4 mM	49
PABA48	N[C@H](C(NC1=CC=C(C(N[C@H](C(NC2=CC=C(C(NC3=C(OC(C)C)C(O)=C(C(NC4=C(OC(C)C)C(O)=C(C(O)=O)C=C4)=O)C=C3)=O)C=C2)=O)[C@@H](OC)C(N)=O)=O)C=C1)=O)CC5=CC=CC=C5		Antibiotic (Gram-positive)	MIC: 0.12-0.25 mg/mL	46
PABA48			Antibiotic (Gram-negative)	MIC: 0.12 to >8 mg/mL	46
PABA70	O=C(N[C@H](C(NC1=CC=C(C(NC2=C(OC(C)C)C(O)=C(C(NC3=C(OC(C)C)C(O)=C(C(O)=O)C=C3)=O)C=C2)=O)C=C1)=O)[C@@H](OC)C(N)=O)C(C=C4)=CC=C4NC([C@H](CC5=CC=C(O)C=C5)N)=O		Antibiotic (Gram-positive)	MIC: 1 mg/mL	46
PABA70			Antibiotic (Gram-negative)	MIC: 4 to >8 mg/mL	46
PABA57	N[C@@H](CC1=CC=C(O)C=C1)C(NC2=CC=C(C(N[C@H](C(NC3=CC=C(C(NC4=C(OC(C)C)C(O)=C(C(NC5=CC=C(C(O)=O)C=C5)=O)C=C4)=O)C=C3)=O)[C@@H](OC)C(N)=O)=O)C=C2)=O		Antibiotic (Gram-positive)	MIC: >8 mg/mL	46
PABA57			Antibiotic (Gram-negative)	MIC: 1to >8 mg/mL	46
PABA34	OC1=CC=C(/C=C(C(NC2=CC=C(C(N[C@H](C(NC3=C(OC)C(O)=C(C(NC4=C(OC)C(O)=C(C(NC5=CC=C(C(O)=O)C=C5)=O)C=C4)=O)C=C3)=O)CC#N)=O)C=C2)=O)\C)C=C1		Antibiotic (Gram-positive)	MIC: >8 mg/mL	46
PABA34			Antibiotic (Gram-neg)	MIC: 0.008 to > 8 mg/mL	46
PABA157	OC1=CC=C(C=C1)/C=C/C(NC(C=C2)=CC=C2C(N[C@@H](CC#N)C(NC3=CC=C(C=C3)C(NC4=CC=C(C(O)=C4OC)C(NC5=CC=C(C=C5)C(O)=O)=O)=O)=O)=O)=O		Antibiotic (Gram-positive)	MIC: 0.5 to >8 mg/mL	46
PABA157			Antibiotic (Gram-negative)	MIC: 0.125-8 mg/mL	46
PABA95	OC1=CC=C(C=C1)/C=C(C(NC(C(OC)=C2O)=CC=C2C(N[C@@H](CC#N)C(NC3=CC=C(C=C3)C(NC4=CC=C(C(O)=C4OC)C(NC5=CC=C(C=C5)C(O)=O)=O)=O)=O)=O)=O)\C		Antibiotic (Gram-positive)	MIC: 4-8 mg/mL	46
PABA95			Antibiotic (Gram-negative)	MIC: 0.25-8 mg/mL	46
Lapcin	CCCCCCCCCCCC(O)CC(N[C@@H](C)C(N[C@H](C(N[C@H](C(NC1=CC=C(C2=NC(C3=NC(C(N[C@H](C(NC4=CC=C(C(NC5=C(OC(C)C)C(O)=C(C(NC6=CC=C(C(O)=O)C=C6)=O)C=C5)=O)C=C4)=O)CC(N)=O)=O)=CS3)=CS2)C=C1)=O)C)=O)CO)=O)=O		Anticancer	IC50: 0.02-923 nM	43
MBA1	CC(C)[C@H](NC(C[C@H](O1)CCCCC)=O)C(N[C@H](CCCNC(N)=N)C(N[C@@H](CO)C(NCC(N[C@@H](C(N[C@H](C(N[C@H](CCCNC(N)=N)C(N[C@@H](CC(N)=O)C(N[C@H](C(C)C)C(N[C@H](CC2=CNC3=C2C=CC=C3)C(NCCCC1=O)=O)=O)=O)=O)=O)CC(C)C)=O)CC4=CC=CC=C4)=O)=O)=O)=O		Antibiotic (Gram-positive)	MIC: 0.5- 4 mg/mL	45
MBA3	O=C(O[C@H](CCCCC)CC(N[C@H]1C(C)C)=O)CCCNC([C@@H](CC2=CNC3=C2C=CC=C3)NC([C@@H](CC4=CC=C(C=C4)O)NC([C@H](CCC(O)=O)NC([C@@H](CCCNC(N)=N)NC([C@@H](NC([C@H]5N(CCC5)C(CNC([C@H](C(C)C)NC([C@@H](CCCNC(N)=N)NC1=O)=O)=O)=O)=O)CC(C)C)=O)=O)=O)=O)=O		Antibiotic (Gram-positive)	MIC: 0.25- 1 mg/mL	45
MBA6	O[C@@H](CC(N[C@H]1COC([C@@H](NC([C@H](CC2=CC=CC=C2)NC([C@H](NC([C@@]([C@H](C)O)(NC([C@@H](NC([C@H](NC([C@H](CC(C)C)NC([C@H](N(C(CNC([C@H](CO)NC([C@H](NC1=O)CC(N)=O)=O)=O)=O)C)CC3=CC=C(O)C=C3)=O)=O)C(C)C)=O)CC(N)=O)=O)[H])=O)CC4=CNC5=C4C=CC=C5)=O)=O)CO)=O)=O)CCCCC		Antibiotic (Gram-positive)	MIC: 4 mg/mL	45
L3	OC1=C([N+]([O-])=O)C=C(C=C1)C[C@H](C(N[C@@H](CCCCN)C(N)=O)=O)NC([C@H](C(C)C)NC([C@H](NC([C@H]([C@H](O)C)NC([C@H](CCCN)NC([C@H](CC2=CNC3=C2C=CC=C3)NC([C@@H](C)NC([C@@H](C(C)C)NC([C@@H](C)NC([C@@H](CC4=CNC5=C4C=CC=C5)N)=O)=O)=O)=O)=O)=O)=O)CCCN)=O)=O		Antibiotic (Gram-neg/+)	MIC: 64-248	50
